# Supplementary material for: Gadofullerene nanoparticles for robust treatment of aplastic anemia induced by chemotherapy drugs
Source: PubMed Central journal article supplement (PMC7295067; doi:10.7150/thno.46794), 2020-05-23
Supplement: thnov10p6886s1.pdf [file thnov10p6886s1.pdf]

## Supporting information

### **Gadofullerene nanoparticles for robust treatment of aplastic anemia induced by chemotherapy**

Wang Jia <sup>a,b</sup>, Mingming Zhen <sup>a,b,\*</sup>, Lei Li <sup>a,b</sup>, Chen Zhou <sup>a,b</sup>, Zihao Sun <sup>a,b</sup>, Shuai Liu <sup>a,b</sup>, Zhongpu Zhao <sup>a,b</sup>, Jie Li <sup>a,b</sup>, Chunru Wang <sup>a,b,\*</sup> and Chunli Bai <sup>a,b,\*</sup>

a. Beijing National Laboratory for Molecular Sciences, Key Laboratory of Molecular Nanostructure and Nanotechnology, CAS Research/Education Center for Excellence in Molecular Sciences, Institute of Chemistry, Chinese Academy of Sciences, Beijing 100190, China.

b. University of Chinese Academy of Sciences, Beijing 100049, China.

Corresponding Email: zhenmm@iccas.ac.cn, crwang@iccas.ac.cn, clbai@cas.cn

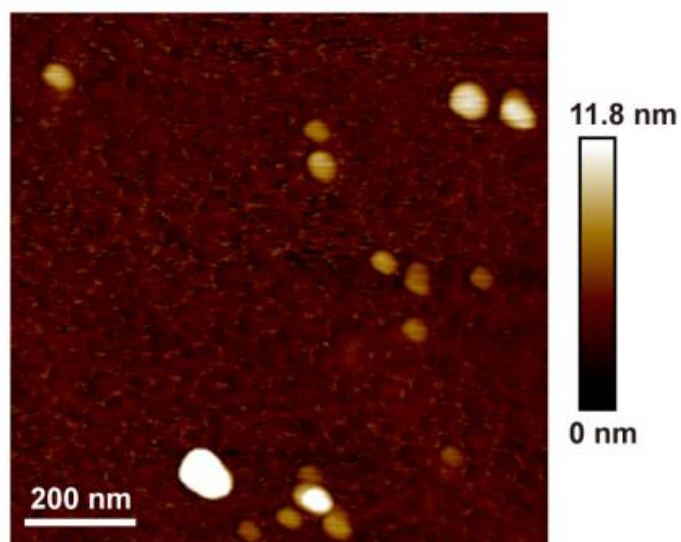

**Figure S1.** The AFM of GFNPs.

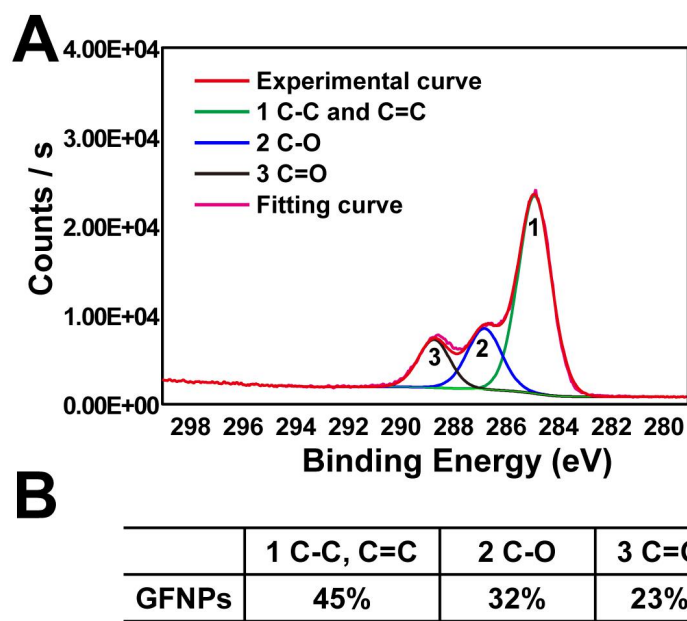

**Figure S2.** The XPS data of GFNPs. **(A)** The XPS spectrum of GFNPs. **(B)** The relative atomic percent contents of C1s (1 C-C, C=C; 2 C-O; 3 C=O) of GFNPs.

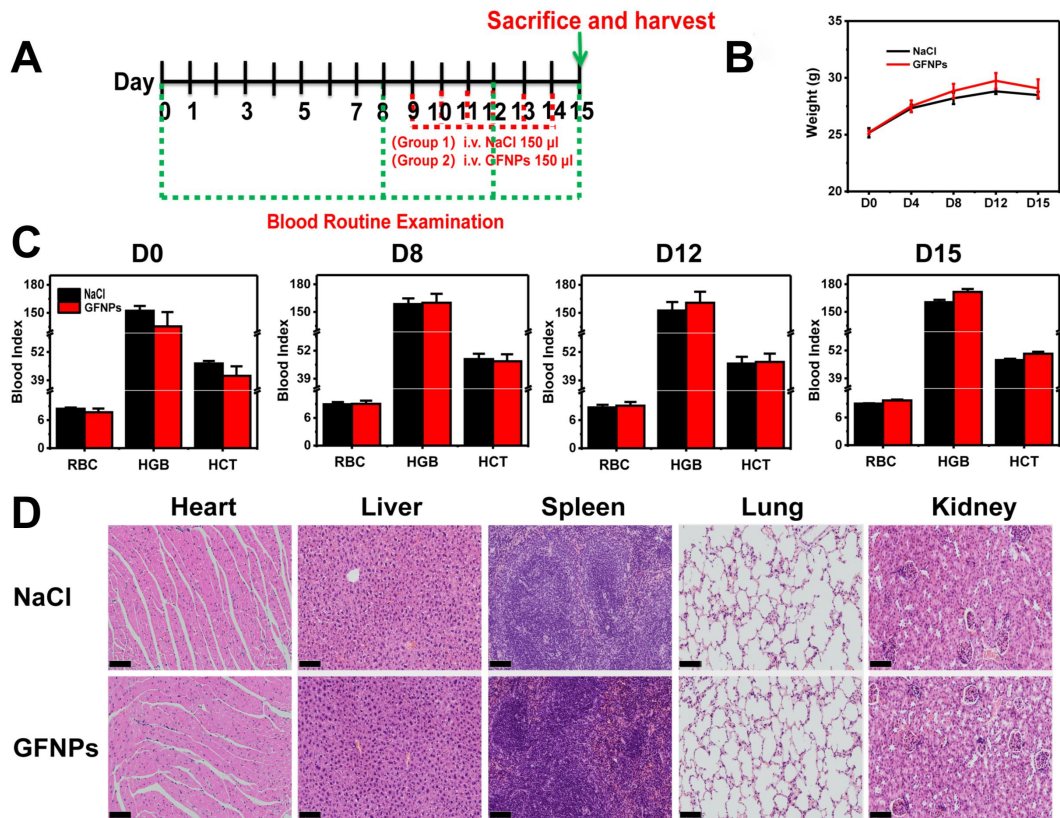

**Figure S3.** The safety evaluations of GFNPs *in vivo*. (A) Schedule of animal experiment treated with GFNPs/NaCl. (B) The changes of body weight during 15 days after i.v. injection GFNPs/NaCl. (C) The changes of hematological indices of mice in different times. (D) The light Microscopy of H&E sections of heart, liver, spleen, lung, and kidney. Scale bars are 100  $\mu$ m.

**Table S1.** The blood analysis of hepatic and nephrotic toxicity of GFNPs. (n=5; \* p < 0.05, \*\* p < 0.01, vs Control group)

| Parameters        | Groups             |                    |                    |
|-------------------|--------------------|--------------------|--------------------|
|                   | Control            | AA                 | AA+GFNPs           |
| ALT (U/L)         | 40.00 $\pm$ 9.90   | 33.33 $\pm$ 2.08   | 36.50 $\pm$ 6.36   |
| AST (U/L)         | 182.00 $\pm$ 19.80 | 133.50 $\pm$ 2.12* | 199.00 $\pm$ 9.92  |
| ALP (U/L)         | 83.70 $\pm$ 1.13   | 104.70 $\pm$ 8.06* | 92.75 $\pm$ 8.27   |
| UA ( $\mu$ mol/L) | 183.61 $\pm$ 3.50  | 78.02 $\pm$ 3.70** | 122.39 $\pm$ 29.31 |
| BUN (mmol/L)      | 9.92 $\pm$ 1.16    | 5.91 $\pm$ 0.69*   | 6.98 $\pm$ 0.64    |
